# Supplementary material for: Assessment of Ruthenium Dye N719 Adsorption Kinetics in Mesoporous TiO2 Films of Dye-Sensitized Solar Cells via Nanoplasmonic Sensing
Source: Hindawi journal article supplement (doi:10.1155/2018/9808697), 2018-10-18
Supplement: f1 [file 9808697.f1.docx]

**Supporting Information**

**Assessment of Ruthenium Dye N719 Adsorption Kinetics in Mesoporous TiO2 films of Dye-Sensitized Solar Cells via Nanoplasmonic Sensing**

Fahd M. Rajab*

Chemical Engineering Department, College of Engineering, Najran University, Saudi Arabia.

Promising Centre for Sensors and Electronic Devices (PCSED), Advanced Materials and Nano-Research Centre, Najran University, P.O. Box: 1988, Najran 11001, Saudi Arabia.

* E-mail: [fmrajab@nu.edu.sa](mailto:fmrajab@nu.edu.sa); fahdrajab@gmail.com

**
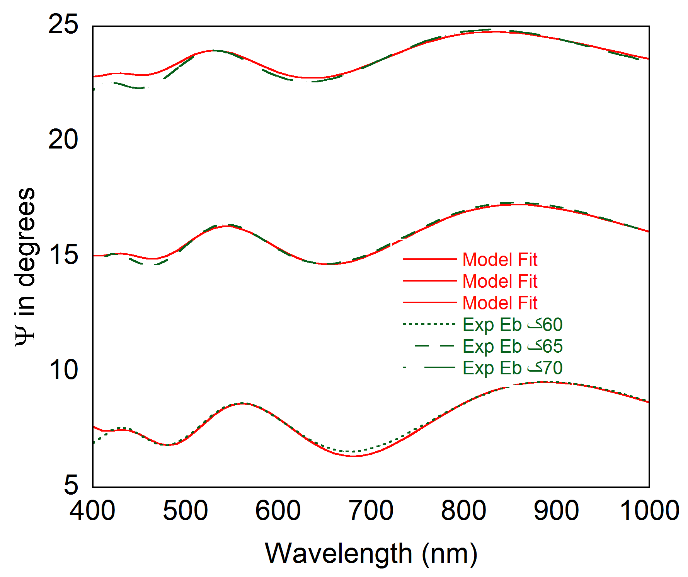
**

**Figure S1.** Ellipsometery measurement of TiO2-photoelectrodes thickness.


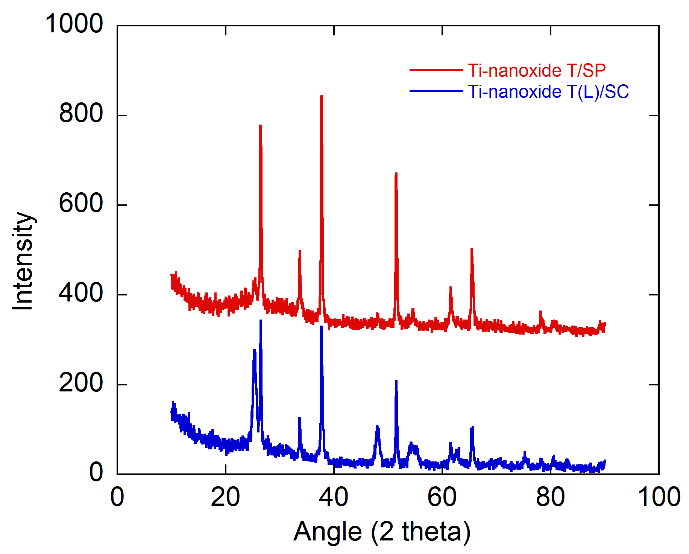


**Figure S2.** X-ray diffraction measurement of screen-printing Ti-nanoxide T/SP and spin coating Ti-nanoxide T(L)/SP mesoporous titania films shows peaks of anatase titania.

| 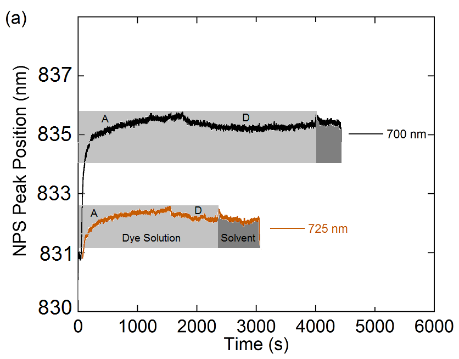 | 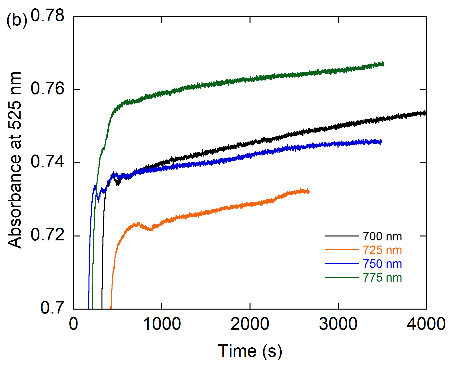 |
| --- | --- |
| 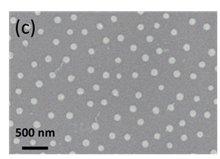 | 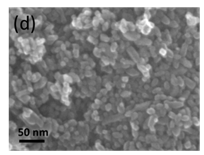 |

**Figure S3.** (a)Nanoplasmonic peak shifts indicative of (A) adsorption and (D) desorption of N719 dye into 700 nm and 725 nm TiO2-photoelectrodes sintered at 100 ˚C. (b) Faster saturation of N719 dye on thicker films reflected by lower slope of dye absorbance at 525 nm. Typical SEM images of (c) Au nano-sensors and (d) mesoporous TiO2 film.

| 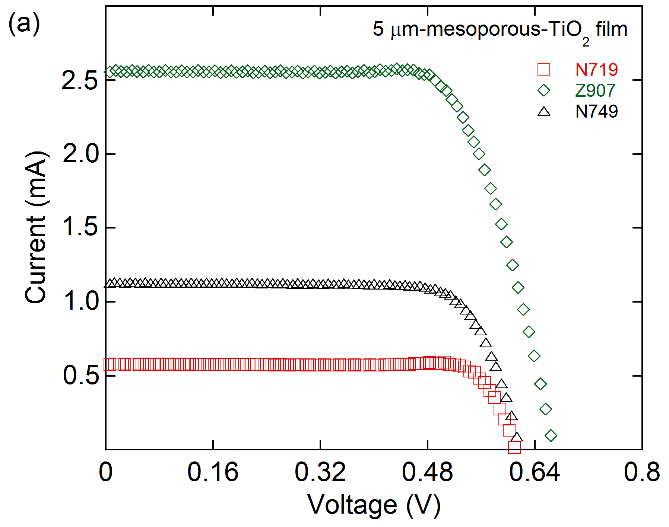 | 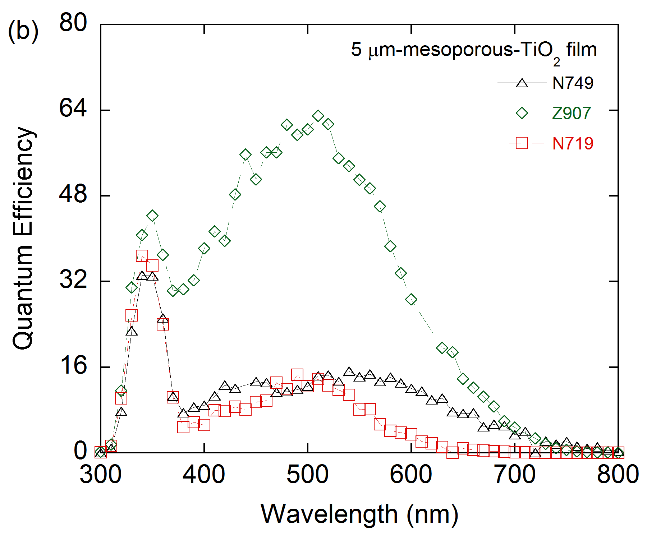 |
| --- | --- |
| 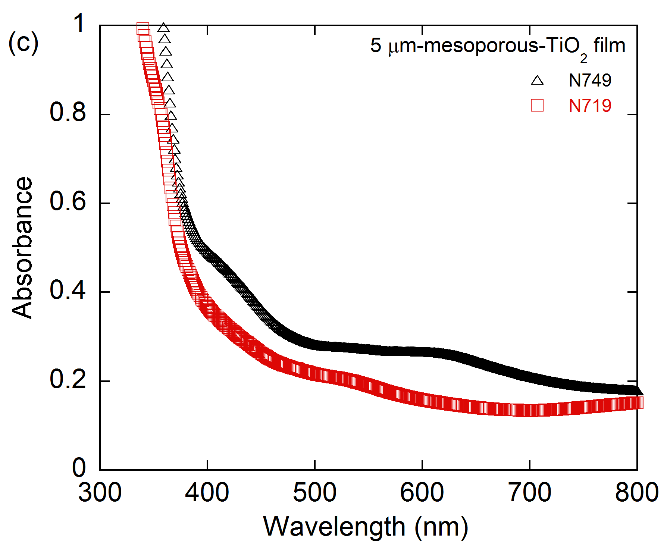 | |

**Figure S4.** (a) IV and (b) quantum efficiency characteristic curves of devices fabricated with 5 m-mesoporous TiO2 films using N719, Z907 and N749 Ruthenium dyes. (c) Absorbance at N719, and N749 dye peaks on solid 5 m-mesoporous TiO2 films show correlation with device quantum efficiency.

| 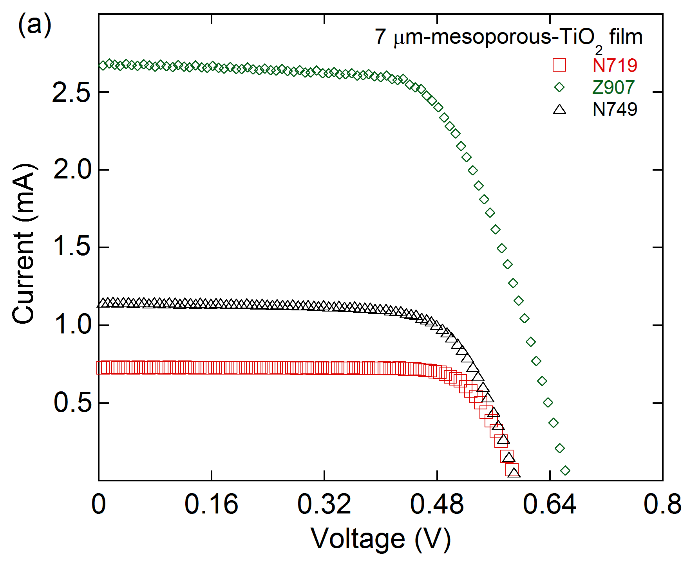 | 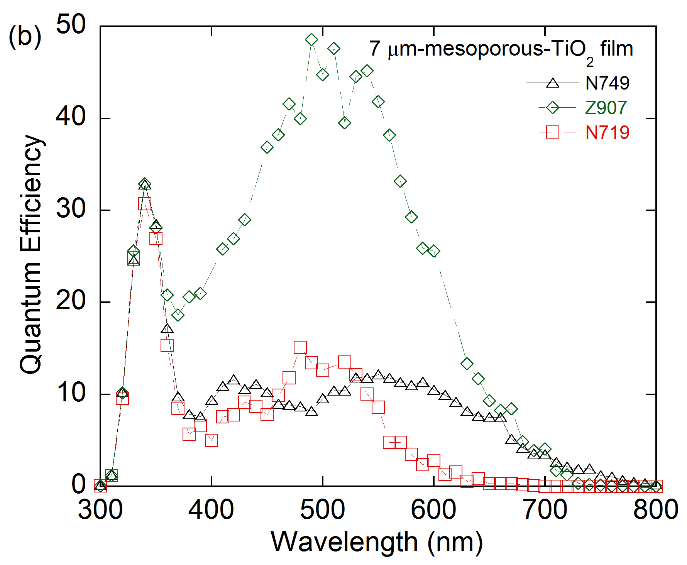 |
| --- | --- |
| 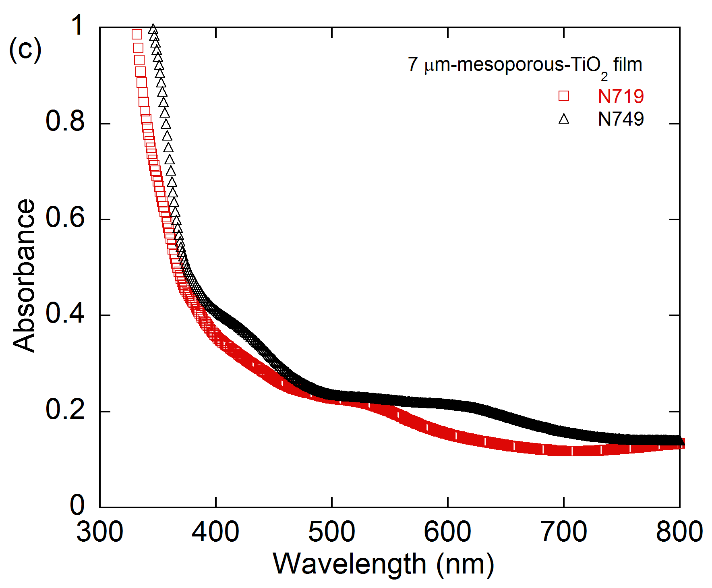 | |

**Figure S5.** (a) IV and (b) quantum efficiency characteristic curves of devices fabricated with 7 m-mesoporous TiO2 films using N719, Z907 and N749 Ruthenium dyes. (c) Absorbance at N719, and N749 dye peaks on solid 7 m-mesoporous TiO2 films show correlation with device quantum efficiency.
